# Supplementary material
Source: publisher figshare collection journal article supplement (https://acs.figshare.com/ndownloader/files/3801022)
Supplement: Supplementary file 1 [file 3801022]

## Supporting Information

### Significant Promotion Effect of Mo Additive on Novel Ce-Zr Mixed Oxide Catalyst for the Selective Catalytic Reduction of NO<sub>x</sub> with NH<sub>3</sub>

*Shipeng Ding, Fudong Liu\*†, Xiaoyan Shi, Kuo Liu, Zhihua Lian, Lijuan Xie, Hong He\**

State Key Joint Laboratory of Environment Simulation and Pollution Control, Research  
Center for Eco-Environmental Sciences, Chinese Academy of Sciences, 18 Shuangqing  
Road, Haidian District, Beijing 100085, P.R. China.

Fax: +86 10 62849123; Tel: +86 10 62849123

\* Corresponding authors: fudongliu@lbl.gov, lfd1982@gmail.com (F. Liu);

honghe@rcees.ac.cn (H. He)

†Present address: Materials Sciences Division, Lawrence Berkeley National Laboratory, 1

Cyclotron Road, Berkeley, CA 94720

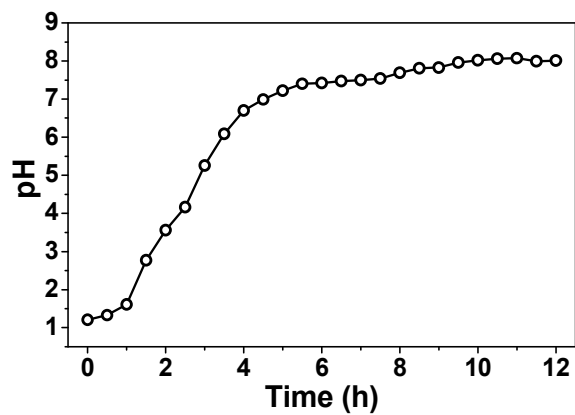

**Figure S1.** pH values variation during the process of the homogeneous precipitation over optimized  $\text{CeMo}_{0.5}\text{Zr}_2\text{O}_x$  catalyst.

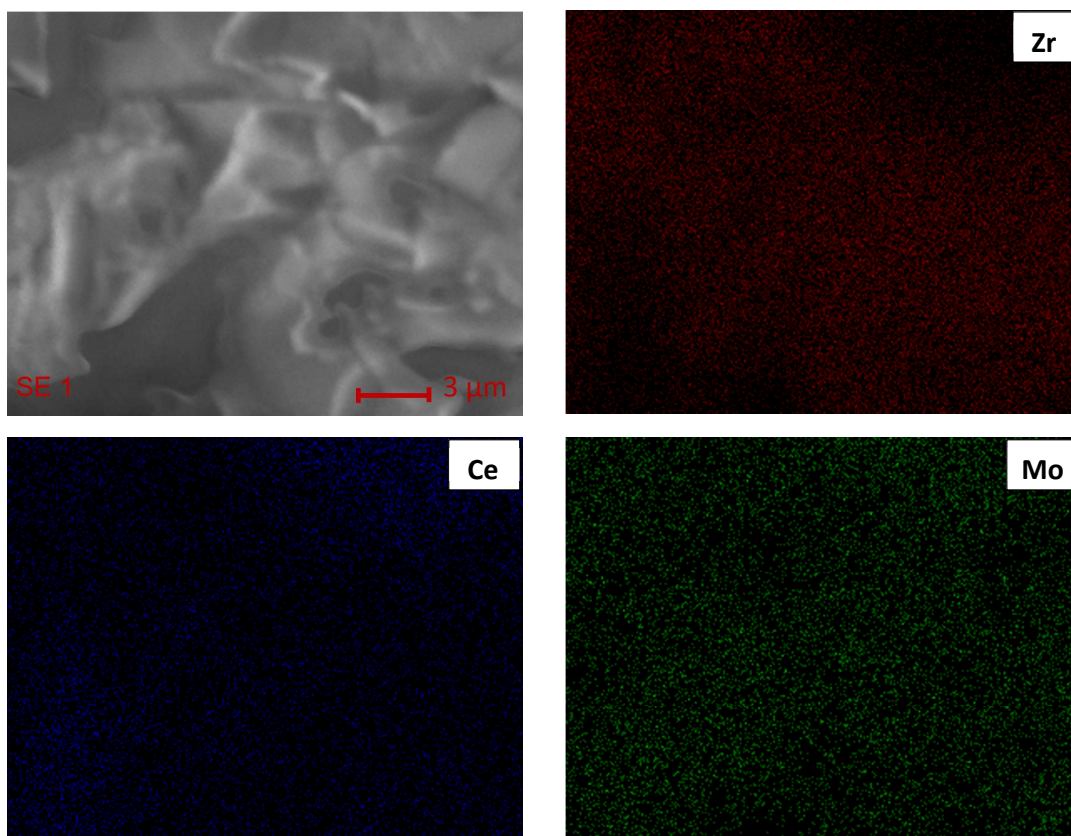

**Figure S2.** The distribution of Zr, Ce and Mo on  $\text{CeMo}_{0.5}\text{Zr}_2\text{O}_x$  catalyst derived from SEM-EDX.

**Table S1** the designed and actual bulk molar ratios on  $\text{CeMo}_a\text{Zr}_2\text{O}_x$  series catalysts prepared by a homogeneous precipitation method

| samples                                  | designed molar ratio<br>(Ce : Mo : Zr) | actual molar ratio<br>(Ce : Mo : Zr) |
|------------------------------------------|----------------------------------------|--------------------------------------|
| $\text{CeZr}_2\text{O}_x$                | 1 : 0.0 : 2                            | 1 : 0.00 : 1.69                      |
| $\text{CeMo}_{0.1}\text{Zr}_2\text{O}_x$ | 1 : 0.1 : 2                            | 1 : 0.02 : 1.40                      |
| $\text{CeMo}_{0.5}\text{Zr}_2\text{O}_x$ | 1 : 0.5 : 2                            | 1 : 0.42 : 1.72                      |
| $\text{CeMo}_{1.0}\text{Zr}_2\text{O}_x$ | 1 : 1.0 : 2                            | 1 : 0.75 : 1.52                      |
| $\text{CeMo}_{1.5}\text{Zr}_2\text{O}_x$ | 1 : 1.5 : 2                            | 1 : 1.03 : 1.41                      |

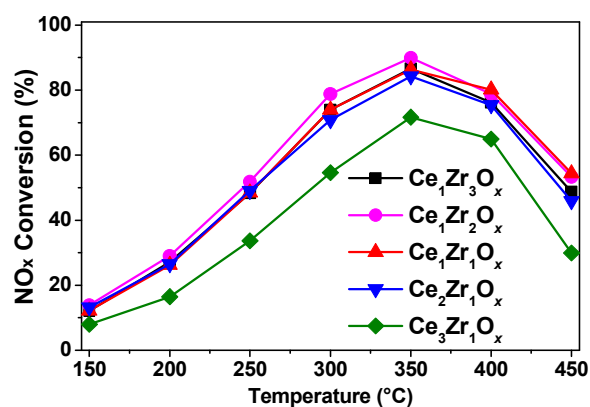

**Figure S3.**  $\text{NO}_x$  conversion in  $\text{NH}_3$ -SCR reaction as a function of temperature over  $\text{CeZrO}_x$  series catalysts. Reaction conditions:  $[\text{NO}] = [\text{NH}_3] = 500$  ppm,  $[\text{O}_2] = 5$  vol.%, GHSV =  $50,000 \text{ h}^{-1}$ .

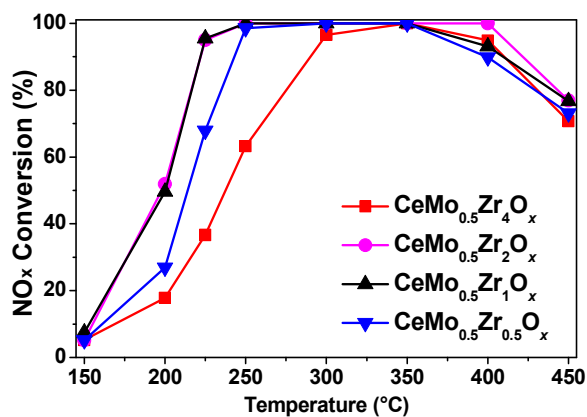

**Figure S4.** NO<sub>x</sub> conversion in NH<sub>3</sub>-SCR reaction as a function of temperature over CeMo<sub>0.5</sub>Zr<sub>b</sub>O<sub>x</sub> ( $b = 0.5, 1.0, 2.0, 4.0$ ) catalysts. Reaction conditions: [NO] = [NH<sub>3</sub>] = 500 ppm, [O<sub>2</sub>] = 5 vol.%, GHSV = 50,000 h<sup>-1</sup>.

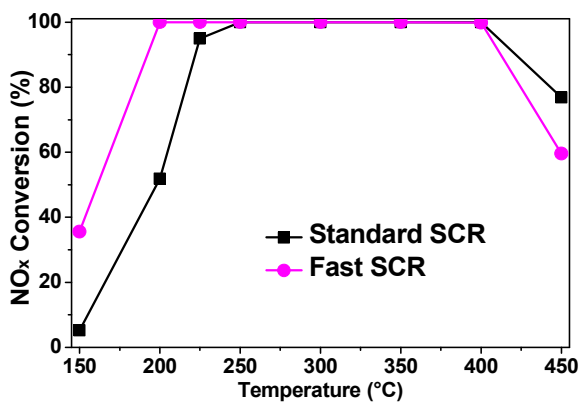

**Figure S5.** NO<sub>x</sub> conversion in NH<sub>3</sub>-SCR reaction as a function of temperature over V<sub>2</sub>O<sub>5</sub>-WO<sub>3</sub>/TiO<sub>2</sub> catalysts with various V<sub>2</sub>O<sub>5</sub> contents. Reaction conditions: [NO] = 500 ppm (or [NO] = 250 ppm, [NO<sub>2</sub>] = 250 ppm), [NH<sub>3</sub>] = 500 ppm, [O<sub>2</sub>] = 5 vol.%, GHSV = 50,000 h<sup>-1</sup>.

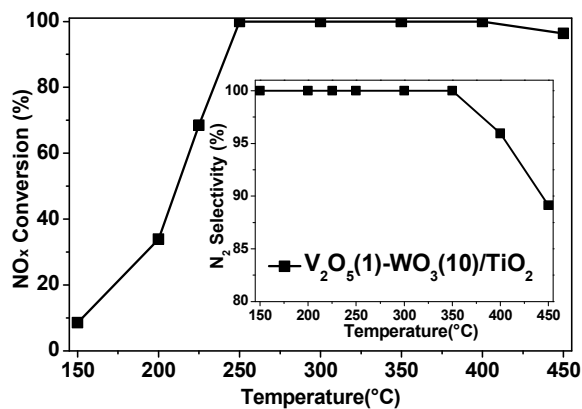

**Figure S6.** NO<sub>x</sub> conversion and N<sub>2</sub> selectivity (inserted) in NH<sub>3</sub>-SCR reaction as a function of temperature over V<sub>2</sub>O<sub>5</sub>(1)-WO<sub>3</sub>(10)/TiO<sub>2</sub> catalyst. Reaction conditions: [NO] = [NH<sub>3</sub>] = 500 ppm, [O<sub>2</sub>] = 5 vol.%, GHSV = 50,000 h<sup>-1</sup>.

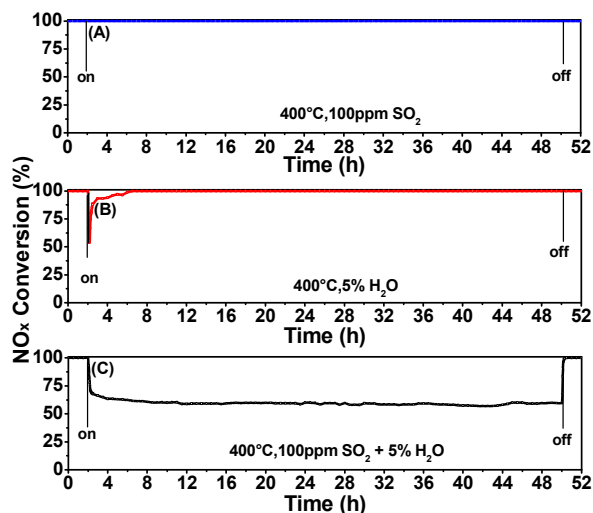

**Figure S7.** The effect of SO<sub>2</sub> (A), H<sub>2</sub>O (B) and SO<sub>2</sub> + H<sub>2</sub>O (C) on the SCR activity over CeMo<sub>0.5</sub>Zr<sub>2</sub>O<sub>x</sub> catalyst at 400 °C. Reaction conditions: [NO] = [NH<sub>3</sub>] = 500 ppm, [O<sub>2</sub>] = 5 vol.%, [SO<sub>2</sub>] = 100 ppm, [H<sub>2</sub>O] = 5 vol.%, GHSV = 50,000 h<sup>-1</sup>.

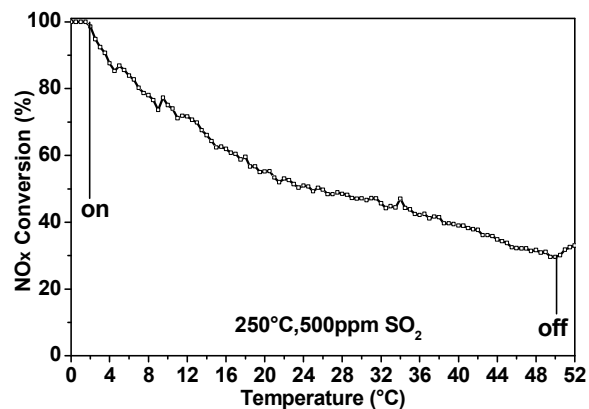

**Figure S8.** The effect of 500 ppm  $\text{SO}_2$  on the SCR activity over  $\text{CeMo}_{0.5}\text{Zr}_2\text{O}_x$  catalyst at 250 °C. Reaction conditions:  $[\text{NO}] = [\text{NH}_3] = 500 \text{ ppm}$ ,  $[\text{O}_2] = 5 \text{ vol.}\%$ ,  $[\text{SO}_2] = 500 \text{ ppm}$ ,  $[\text{H}_2\text{O}] = 5 \text{ vol.}\%$ , GHSV =  $50,000 \text{ h}^{-1}$ .

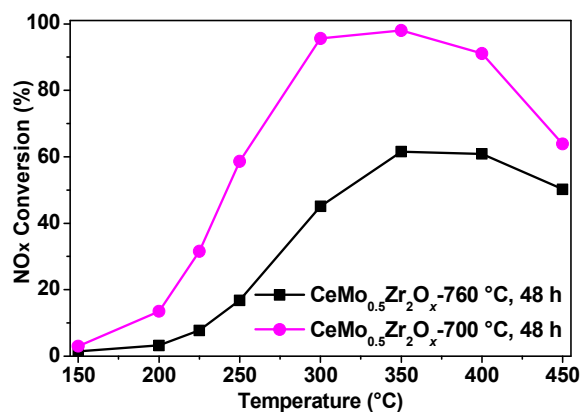

**Figure S9.**  $\text{NO}_x$  conversion in  $\text{NH}_3$ -SCR reaction as a function of temperature over  $\text{CeMo}_{0.5}\text{Zr}_2\text{O}_x$  catalysts hydrothermal aged at 700 or 760 °C for 48 h. Reaction conditions:  $[\text{NO}] = [\text{NH}_3] = 500 \text{ ppm}$ ,  $[\text{O}_2] = 5 \text{ vol.}\%$ , GHSV =  $50,000 \text{ h}^{-1}$ .

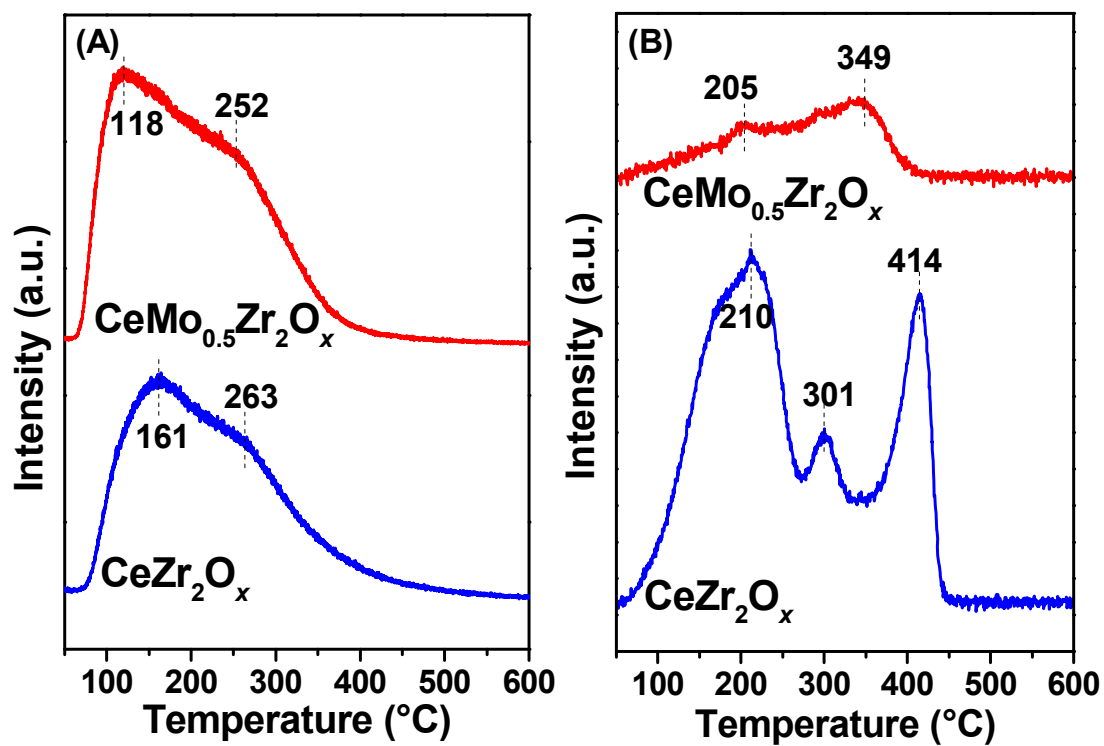

**Figure S10.**  $\text{NH}_3$ -TPD (A) and  $\text{NO}$ -TPD (B) results over  $\text{CeZr}_2\text{O}_x$  and  $\text{CeMo}_{0.5}\text{Zr}_2\text{O}_x$

catalysts.
